# Supplementary material for: The Association between Circulating microRNAs and the Risk of Active Disease Development from Latent Tuberculosis Infection: a Nested Case-Control Study
Source: PubMed Central journal article supplement (PMC9241859; doi:10.1128/spectrum.02625-21), 2022-04-18
Supplement: spectrum.02625-21-s001.pdf [file spectrum.02625-21-s001.pdf]

## Supporting Information

The association between circulating microRNAs and the risk of active disease development from latent tuberculosis infection: a nested case-control study

Henan Xin<sup>1†</sup>, Xuefang Cao<sup>1†</sup>, Ying Du<sup>1†</sup>, Jiaoxia Yan<sup>2†</sup>, Rui He<sup>3</sup>, Zisen Liu<sup>2</sup>, Haoran Zhang<sup>1</sup>, Yijun He<sup>1</sup>, Bin Zhang<sup>2</sup>, Dakuan Wang<sup>2</sup>, Ling Guan<sup>3</sup>, Fei Shen<sup>3</sup>, Boxuan Feng<sup>1</sup>, Zhusheng Quan<sup>1</sup>, Yongpeng He<sup>1</sup>, Jianmin Liu<sup>3</sup>, Qi Jin<sup>1</sup>, \*Shouguo Pan<sup>2</sup>, \*Lei Gao<sup>1</sup>

1. NHC Key Laboratory of Systems Biology of Pathogens, Institute of Pathogen Biology, and Center for Tuberculosis Research, Chinese Academy of Medical Sciences and Peking Union Medical College, Beijing 100730, P.R. China.
2. Center for Diseases Control and Prevention of Zhongmu, Zhengzhou 451450, China.
3. The Sixth People's Hospital of Zhengzhou, Zhengzhou 400060, China.

† Contributed equally

**Correspondence:** Prof. Lei Gao, NHC Key Laboratory of Systems Biology of Pathogens, Institute of Pathogen Biology, Chinese Academy of Medical Sciences and Peking Union Medical College, No 9 Dong Dan San Tiao, Beijing 100730, China. Email: gaolei@ipbcams.ac.cn. Prof. Shouguo Pan, Center for Diseases Control and Prevention of Zhongmu, No. 1106, Youth West Road, Zhongmou County, Zhengzhou 451450, China., Email: psgzmc@163.com

**Table S1 Baseline characteristics of 150 individuals selected for RT-qPCR verification**

| Variables                                                        | TB cases            | LTBI controls       | P value                      | OR (95%CI)                 |
|------------------------------------------------------------------|---------------------|---------------------|------------------------------|----------------------------|
| <b>Total*</b> , n                                                | 73                  | 77                  |                              |                            |
| <b>Gender</b> , n (%)                                            |                     |                     |                              |                            |
| Female                                                           | 23 (31.51)          | 25 (32.47)          | 0.900 <sup>#</sup>           |                            |
| Male                                                             | 50 (68.49)          | 52 (67.53)          |                              |                            |
| <b>Age (years)</b> , n (%)                                       |                     |                     |                              |                            |
| <40                                                              | 5 (6.85)            | 5 (6.49)            | 0.984 <sup>#</sup>           |                            |
| 40-59                                                            | 19 (26.03)          | 21 (27.27)          |                              |                            |
| ≥60                                                              | 49 (67.12)          | 51 (66.23)          |                              |                            |
| <b>BMI (kg/m<sup>2</sup>)</b> , n (%)                            |                     |                     |                              |                            |
| <18.5                                                            | 8 (10.96)           | 3 (3.90)            | <b>0.017<sup>#</sup></b>     |                            |
| 18.5-24                                                          | 46 (63.01)          | 38 (49.35)          |                              |                            |
| ≥24                                                              | 19 (26.03)          | 36 (46.75)          |                              |                            |
| Mean ± SD                                                        | 22.1 ± 3.24         | 24.0 ± 3.54         | 0.001 <sup>&amp;</sup>       | <b>0.88 (0.78-0.99)</b>    |
| <b>Self-reported history of type 2 diabetes</b> , n (%)          |                     |                     |                              |                            |
| No                                                               | 66 (90.41)          | 70 (90.91)          | 0.917 <sup>#</sup>           |                            |
| Yes                                                              | 7 (9.59)            | 7 (9.09)            |                              |                            |
| <b>Self-reported history of household close contacts</b> , n (%) |                     |                     |                              |                            |
| No                                                               | 64 (87.67)          | 75 (97.40)          | <b>0.022<sup>#</sup></b>     | Ref                        |
| Yes                                                              | 9 (12.33)           | 2 (2.60)            |                              | 3.68 (0.64-21.15)          |
| <b>History of prior TB<sup>†</sup></b> , n (%)                   |                     |                     |                              |                            |
| Without prior TB                                                 | 41 (56.16)          | 76 (98.70)          | <b>&lt;0.001<sup>#</sup></b> | Ref                        |
| With prior TB                                                    | 32 (43.84)          | 1 (1.30)            |                              | <b>50.90 (6.63-390.65)</b> |
| <b>Baseline TST (mm)</b>                                         |                     |                     |                              |                            |
| Median, Q25-Q75                                                  | 23.00 (18.00-29.50) | 20.50 (15.50-26.00) | 0.082 <sup>†</sup>           |                            |
| <b>Baseline IFN-γ (IU/ml)</b>                                    |                     |                     |                              |                            |
| Median, Q25-Q75                                                  | 2.46 (1.35-5.34)    | 2.26 (1.21-5.13)    | 0.700 <sup>†</sup>           |                            |

Abbreviation: CI=confidence interval; BMI=Body mass index; TB=tuberculosis; Q25=25% quantile; Q75=75% quantile; TST= tuberculin skin test; OR=odds ratio; RT-qPCR, real-time Quantitative PCR.

\*Data might not sum to total because of missing data. <sup>†</sup>p for Wilcoxon rank sum test. <sup>#</sup> p for  $\chi^2$  test. <sup>&</sup>p for T test.

**Table S2 Total RNA for 40 samples used for microarray**

| <b>Reagent Name</b> | <b>Qiagen serum/Plasma Kit-<br/>Qiagen#217184</b> | <b>Reagent Lot#</b>                    | <b>154035945</b>                | <b>Number of samples:<br/>40</b> |
|---------------------|---------------------------------------------------|----------------------------------------|---------------------------------|----------------------------------|
| <b>No.</b>          | <b>Sample Name</b>                                | <b>Con.<br/>(ng/<math>\mu</math>L)</b> | <b>Vol. (<math>\mu</math>L)</b> | <b>Total (<math>\mu</math>g)</b> |
| 1                   | 21217301a                                         | 5.6                                    | 30                              | 0.168                            |
| 2                   | 22205801a                                         | 13                                     | 30                              | 0.39                             |
| 3                   | 52028201a                                         | 8                                      | 30                              | 0.24                             |
| 4                   | 51187401a                                         | 7.1                                    | 30                              | 0.213                            |
| 5                   | 51187403a                                         | 10.7                                   | 30                              | 0.321                            |
| 6                   | 51162201a                                         | 6                                      | 30                              | 0.18                             |
| 7                   | 51146401a                                         | 5.6                                    | 30                              | 0.168                            |
| 8                   | 51140201a                                         | 4.7                                    | 30                              | 0.141                            |
| 9                   | 51081606a                                         | 5.6                                    | 30                              | 0.168                            |
| 10                  | 51081801a                                         | 6.3                                    | 30                              | 0.189                            |
| 11                  | 51102306a                                         | 5.7                                    | 30                              | 0.171                            |
| 12                  | 52080102a                                         | 5.1                                    | 30                              | 0.153                            |
| 13                  | 51226901a                                         | 5.6                                    | 30                              | 0.168                            |
| 14                  | 51261102a                                         | 6.9                                    | 30                              | 0.207                            |
| 15                  | 52047301a                                         | 7.4                                    | 30                              | 0.222                            |
| 16                  | 52009601a                                         | 4.4                                    | 30                              | 0.132                            |
| 17                  | 52067001a                                         | 5.9                                    | 30                              | 0.177                            |
| 18                  | 51202001a                                         | 7.2                                    | 30                              | 0.216                            |
| 19                  | 51243702a                                         | 5.2                                    | 30                              | 0.156                            |
| 20                  | 31095601a                                         | 7.4                                    | 30                              | 0.222                            |
| 21                  | 40104002                                          | 12.6                                   | 30                              | 0.378                            |
| 22                  | 21109301                                          | 10                                     | 30                              | 0.3                              |
| 23                  | 21411601                                          | 12                                     | 30                              | 0.36                             |
| 24                  | 21215201                                          | 11.9                                   | 30                              | 0.357                            |
| 25                  | 40102943                                          | 12.2                                   | 30                              | 0.366                            |
| 26                  | 40106592                                          | 10.1                                   | 30                              | 0.303                            |
| 27                  | 21305303                                          | 8                                      | 30                              | 0.24                             |
| 28                  | 21100502                                          | 8.9                                    | 30                              | 0.267                            |
| 29                  | 40106030                                          | 5.3                                    | 30                              | 0.159                            |
| 30                  | 21428301                                          | 6.3                                    | 30                              | 0.189                            |
| 31                  | 21110601                                          | 10.3                                   | 30                              | 0.309                            |
| 32                  | 40201081                                          | 5.8                                    | 30                              | 0.174                            |
| 33                  | 21216801                                          | 7.1                                    | 30                              | 0.213                            |
| 34                  | 21111901                                          | 6.3                                    | 30                              | 0.189                            |
| 35                  | 40201061                                          | 7.4                                    | 30                              | 0.222                            |
| 36                  | 22314902                                          | 6.7                                    | 30                              | 0.201                            |
| 37                  | 40103040                                          | 15.8                                   | 30                              | 0.474                            |
| 38                  | 21414001                                          | 11.2                                   | 30                              | 0.336                            |
| 39                  | 22511304                                          | 5                                      | 30                              | 0.15                             |
| 40                  | 22102601                                          | 5.4                                    | 30                              | 0.162                            |

**Table S3 Total RNA for 150 samples used for RT-qPCR**

| <b>Reagent Name</b> | <b>Qiagen serum/Plasma Kit- Qiagen#217184</b> | <b>Reagent Lot#</b> | <b>160044181</b> | <b>Number of samples: 150</b> |
|---------------------|-----------------------------------------------|---------------------|------------------|-------------------------------|
| <b>No.</b>          | <b>Sample Name</b>                            | <b>Con. (ng/μL)</b> | <b>Vol. (μL)</b> | <b>Total (μg)</b>             |
| 1                   | 14002201                                      | 5.8                 | 30               | 0.174                         |
| 2                   | 14013901                                      | 6                   | 30               | 0.18                          |
| 3                   | 16004601                                      | 6.6                 | 30               | 0.198                         |
| 4                   | 16024201                                      | 7.2                 | 30               | 0.216                         |
| 5                   | 12000301                                      | 7.6                 | 30               | 0.228                         |
| 6                   | 12038601                                      | 5.3                 | 30               | 0.159                         |
| 7                   | 12023101                                      | 4.7                 | 30               | 0.141                         |
| 8                   | 12004401                                      | 5.9                 | 30               | 0.177                         |
| 9                   | 12025801                                      | 6.8                 | 30               | 0.204                         |
| 10                  | 12020303                                      | 8.9                 | 30               | 0.267                         |
| 11                  | 12005101                                      | 6.9                 | 30               | 0.207                         |
| 12                  | 13027302                                      | 6.8                 | 30               | 0.204                         |
| 13                  | 13004101                                      | 5                   | 30               | 0.15                          |
| 14                  | 13016304                                      | 6.1                 | 30               | 0.183                         |
| 15                  | 13017902                                      | 6.4                 | 30               | 0.192                         |
| 16                  | 13011604                                      | 5.1                 | 30               | 0.153                         |
| 17                  | 13001902                                      | 7                   | 30               | 0.21                          |
| 18                  | 13014501                                      | 10.4                | 30               | 0.312                         |
| 19                  | 13022807                                      | 12.2                | 30               | 0.366                         |
| 20                  | 11023301                                      | 8.6                 | 30               | 0.258                         |
| 21                  | 11014104                                      | 6.5                 | 30               | 0.195                         |
| 22                  | 11027201                                      | 6.6                 | 30               | 0.198                         |
| 23                  | 11041103                                      | 6.4                 | 30               | 0.192                         |
| 24                  | 16026901                                      | 12.3                | 30               | 0.369                         |
| 25                  | 16040904                                      | 9.4                 | 30               | 0.282                         |
| 26                  | 14009201                                      | 7.6                 | 30               | 0.228                         |
| 27                  | 16006801                                      | 6.7                 | 30               | 0.201                         |
| 28                  | 15029201                                      | 7.3                 | 30               | 0.219                         |
| 29                  | 15013403                                      | 8.3                 | 30               | 0.249                         |
| 30                  | 15043101                                      | 5.4                 | 30               | 0.162                         |
| 31                  | 15024502                                      | 5.8                 | 30               | 0.174                         |
| 32                  | 21417102                                      | 6.4                 | 30               | 0.192                         |
| 33                  | 21206505                                      | 8.7                 | 30               | 0.261                         |
| 34                  | 23304001                                      | 5.3                 | 30               | 0.159                         |
| 35                  | 23317002                                      | 6.6                 | 30               | 0.198                         |
| 36                  | 22512301                                      | 6.1                 | 30               | 0.183                         |
| 37                  | 21217301                                      | 6                   | 30               | 0.18                          |
| 38                  | 21205105                                      | 7.2                 | 30               | 0.216                         |

|    |          |      |    |       |
|----|----------|------|----|-------|
| 39 | 22205801 | 6.1  | 30 | 0.183 |
| 40 | 32008403 | 5.6  | 30 | 0.168 |
| 41 | 32056403 | 5.4  | 30 | 0.162 |
| 42 | 31022101 | 7.9  | 30 | 0.237 |
| 43 | 31035803 | 5.5  | 30 | 0.165 |
| 44 | 31989503 | 6.1  | 30 | 0.183 |
| 45 | 31139101 | 5.6  | 30 | 0.168 |
| 46 | 32011501 | 5.5  | 30 | 0.165 |
| 47 | 32070401 | 10   | 30 | 0.3   |
| 48 | 31045004 | 7.8  | 30 | 0.234 |
| 49 | 32069705 | 6.7  | 30 | 0.201 |
| 50 | 32016903 | 9.3  | 30 | 0.279 |
| 51 | 31095601 | 10.6 | 30 | 0.318 |
| 52 | 51081606 | 7.6  | 30 | 0.228 |
| 53 | 52047301 | 9.3  | 30 | 0.279 |
| 54 | 51063202 | 5.4  | 30 | 0.162 |
| 55 | 51140201 | 16.5 | 30 | 0.495 |
| 56 | 52080102 | 8.2  | 30 | 0.246 |
| 57 | 51083202 | 8.1  | 30 | 0.243 |
| 58 | 51261102 | 7.1  | 30 | 0.213 |
| 59 | 51043605 | 7.9  | 30 | 0.237 |
| 60 | 51243702 | 5.9  | 30 | 0.177 |
| 61 | 51260603 | 7.7  | 30 | 0.231 |
| 62 | 52067001 | 8.2  | 30 | 0.246 |
| 63 | 53001603 | 7    | 30 | 0.21  |
| 64 | 51000201 | 11.3 | 30 | 0.339 |
| 65 | 51162201 | 9.3  | 30 | 0.279 |
| 66 | 51187403 | 6.1  | 30 | 0.183 |
| 67 | 51281101 | 8.6  | 30 | 0.258 |
| 68 | 51044801 | 6.6  | 30 | 0.198 |
| 69 | 51203901 | 8.4  | 30 | 0.252 |
| 70 | 51244401 | 6.5  | 30 | 0.195 |
| 71 | 51226901 | 9.5  | 30 | 0.285 |
| 72 | 51286501 | 7    | 30 | 0.21  |
| 73 | 51061601 | 6.2  | 30 | 0.186 |
| 74 | 11022301 | 5.8  | 30 | 0.174 |
| 75 | 11021702 | 7.8  | 30 | 0.234 |
| 76 | 11031602 | 11.7 | 30 | 0.351 |
| 77 | 11032801 | 6.6  | 30 | 0.198 |
| 78 | 11035803 | 5.9  | 30 | 0.177 |
| 79 | 11040903 | 6.1  | 30 | 0.183 |
| 80 | 11002601 | 8.9  | 30 | 0.267 |
| 81 | 11041201 | 6.4  | 30 | 0.192 |
| 82 | 11041403 | 5.3  | 30 | 0.159 |
| 83 | 11041705 | 6    | 30 | 0.18  |

|     |          |      |    |       |
|-----|----------|------|----|-------|
| 84  | 16037703 | 7.1  | 30 | 0.213 |
| 85  | 16038602 | 5.6  | 30 | 0.168 |
| 86  | 11024001 | 4.6  | 30 | 0.138 |
| 87  | 15041901 | 4.9  | 30 | 0.147 |
| 88  | 15039302 | 10.1 | 30 | 0.30  |
| 89  | 15027101 | 6    | 30 | 0.18  |
| 90  | 15035502 | 6.9  | 30 | 0.207 |
| 91  | 15009001 | 6.4  | 30 | 0.192 |
| 92  | 15035102 | 4.2  | 30 | 0.126 |
| 93  | 15007301 | 6.5  | 30 | 0.195 |
| 94  | 15035305 | 4.5  | 30 | 0.135 |
| 95  | 15018001 | 8.9  | 30 | 0.27  |
| 96  | 15037703 | 5.3  | 30 | 0.159 |
| 97  | 15006101 | 7    | 30 | 0.21  |
| 98  | 15019701 | 7.9  | 30 | 0.24  |
| 99  | 15030102 | 7    | 30 | 0.22  |
| 100 | 13027802 | 9.4  | 30 | 0.28  |
| 101 | 11032201 | 4.5  | 30 | 0.135 |
| 102 | 14016301 | 7.4  | 30 | 0.22  |
| 103 | 14004204 | 4.1  | 30 | 0.123 |
| 104 | 14033801 | 5.7  | 30 | 0.171 |
| 105 | 16026301 | 5.5  | 30 | 0.165 |
| 106 | 12021502 | 6.8  | 30 | 0.204 |
| 107 | 13004103 | 5.4  | 30 | 0.162 |
| 108 | 22320602 | 6.1  | 30 | 0.183 |
| 109 | 22326108 | 4.8  | 30 | 0.144 |
| 110 | 23335104 | 5.1  | 30 | 0.153 |
| 111 | 21200302 | 6.3  | 30 | 0.189 |
| 112 | 21403001 | 5    | 30 | 0.15  |
| 113 | 21410903 | 9.1  | 30 | 0.28  |
| 114 | 22208102 | 4.8  | 30 | 0.144 |
| 115 | 22407201 | 9.3  | 30 | 0.28  |
| 116 | 22105804 | 4.1  | 30 | 0.123 |
| 117 | 22308202 | 6.1  | 30 | 0.183 |
| 118 | 31090704 | 5.3  | 30 | 0.159 |
| 119 | 31084901 | 6.8  | 30 | 0.20  |
| 120 | 31113101 | 6.7  | 30 | 0.20  |
| 121 | 31136503 | 10.5 | 30 | 0.32  |
| 122 | 32065001 | 14.1 | 30 | 0.423 |
| 123 | 32070001 | 6.1  | 30 | 0.183 |
| 124 | 32054403 | 5.6  | 30 | 0.168 |
| 125 | 31020501 | 8.3  | 30 | 0.25  |
| 126 | 31042001 | 8.7  | 30 | 0.27  |
| 127 | 52044201 | 7.8  | 30 | 0.23  |
| 128 | 52003901 | 4.7  | 30 | 0.141 |

|     |          |     |    |       |
|-----|----------|-----|----|-------|
| 129 | 52065505 | 4.2 | 30 | 0.126 |
| 130 | 52027601 | 4.2 | 30 | 0.126 |
| 131 | 52028605 | 4.9 | 30 | 0.147 |
| 132 | 51205401 | 5   | 30 | 0.15  |
| 133 | 51208203 | 5.4 | 30 | 0.162 |
| 134 | 51102902 | 4.5 | 30 | 0.135 |
| 135 | 51084306 | 5.7 | 30 | 0.171 |
| 136 | 51220306 | 8.4 | 30 | 0.25  |
| 137 | 51162401 | 7.8 | 30 | 0.24  |
| 138 | 51142902 | 5.4 | 30 | 0.162 |
| 139 | 51081603 | 7.5 | 30 | 0.225 |
| 140 | 51062101 | 6.6 | 30 | 0.20  |
| 141 | 51121601 | 7.9 | 30 | 0.23  |
| 142 | 51124203 | 4.6 | 30 | 0.138 |
| 143 | 51081701 | 6.5 | 30 | 0.195 |
| 144 | 53002801 | 6.8 | 30 | 0.21  |
| 145 | 51261702 | 8.7 | 30 | 0.26  |
| 146 | 51283002 | 5.3 | 30 | 0.159 |
| 147 | 51200202 | 6.6 | 30 | 0.20  |
| 148 | 51245202 | 6.4 | 30 | 0.192 |
| 149 | 51244105 | 4.8 | 30 | 0.144 |
| 150 | 51243501 | 5.3 | 30 | 0.159 |

---

RT-qPCR, real-time Quantitative PCR

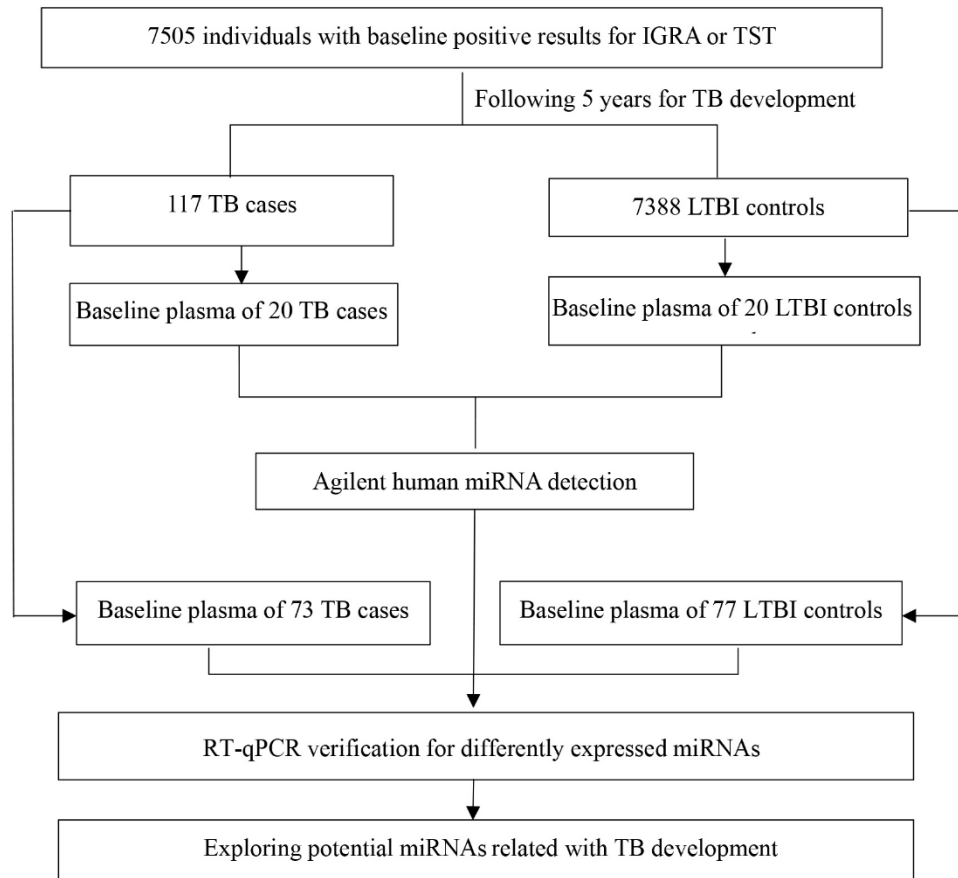

### Supplementary Figure 1 Flow chart

A total of 7505 individuals with baseline positive results for IGRA or TST ( $\geq 10\text{mm}$ ) were followed up 5 years for active TB development. During the five years, 117 TB cases were identified. We first selected 20 TB cases from the 117 cases and 20 age and sex-matched LTBI controls with both positive IGRA and TST results for Agilent Human miRNA Microarray platform interrogating 2549 miRNAs. Six differently expressed miRNA (hsa-miR-16-5p, hsa-miR-197-5p, hsa-miR-451a, hsa-miR-630, hsa-miR-671-5p, hsa-miR-6760-3p) were selected for further RT-qPCR verification among 150 samples (73 TB cases with IGRA+/TST+ results and age-and sex-matched 77 LTBI controls with IGRA+/TST+ results). Abbreviation: IGRA=interferon-gamma release assays; LTBI=latent tuberculosis infection; miRNA=microRNA; RT-qPCR=Real-time quantitative PCR; TB=tuberculosis; TST=tuberculin skin test.



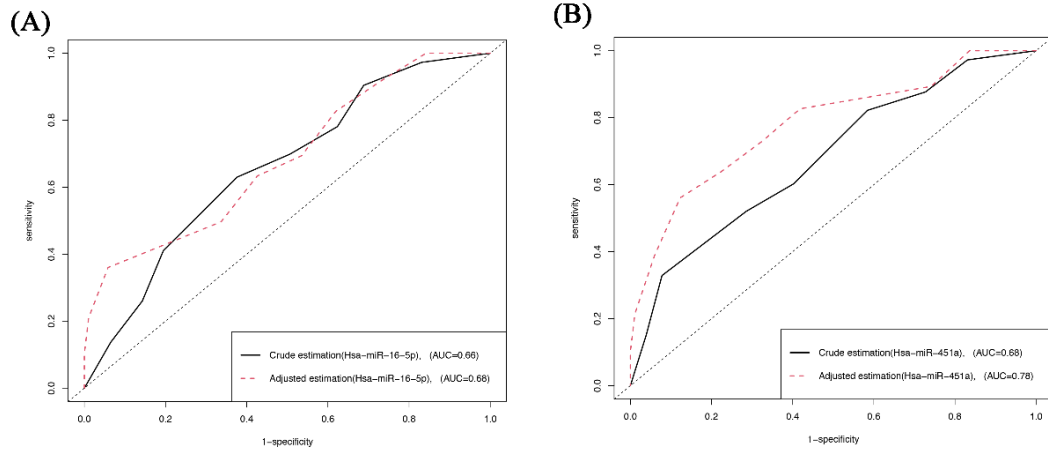

**Supplementary Figure 2 Adjusted AUCs for hsa-miR-16-5p and hsa-miR-451a**

Adjusted AUC for hsa-miR-16-5p (A) and hsa-miR-451a (B) were showed after adjusting the influence of two variables, BMI and with history of prior TB. Hsa-miR-451a showed considerable potentiality in predicting TB development from LTBI. Abbreviation: AUC= area under the receiver operator characteristic curve; BMI= body mass indicator; LTBI=latent tuberculosis infection; TB=tuberculosis.
